# Supplementary material
Source: publisher figshare collection journal article supplement (https://acs.figshare.com/ndownloader/files/21907227)
Supplement: Supplementary file 1 [file 21907227]

# **Facile and efficient two-step formation of renewable monomer 2,5-furandicarboxylic acid from carbohydrates over NiOx catalyst**

Huai Liu,<sup>a</sup> Weile Li,<sup>a</sup> Miao Zuo,<sup>a</sup> Xing Tang,<sup>\*a,b</sup> Xianhai Zeng,<sup>a,b</sup> Yong Sun,<sup>a,b</sup>

Tingzhou Lei,<sup>c</sup> Huayu Fang,<sup>d</sup> Tianyuan Li<sup>d</sup> and Lu Lin<sup>\*a,b</sup>

<sup>a</sup> *Xiamen Key Laboratory of Clean and High-valued Applications of Biomass, College of Energy, Xiamen University, Xiang'an South Road, Xiamen 361102, China.*

<sup>b</sup> *Fujian Engineering and Research Center of Clean and High-valued Technologies for Biomass, Xiamen University, Xiang'an South Road, Xiamen 361005, Fujian, China*

<sup>c</sup> *Henan Key Lab of Biomass Energy, Huayuan Road 29, Zhengzhou 450008, Henan, China*

<sup>d</sup> *Fujian Huafeng New Materials Co., Ltd., Putian 351152, Fujian, China.*

<sup>\*</sup>Corresponding authors. E-mail addresses: [x.tang@xmu.edu.cn](mailto:x.tang@xmu.edu.cn) (X. Tang); [lulin@xmu.edu.cn](mailto:lulin@xmu.edu.cn) (L. Lin).

Number of pages: 15

Number of figures: 10

Number of tables: 4

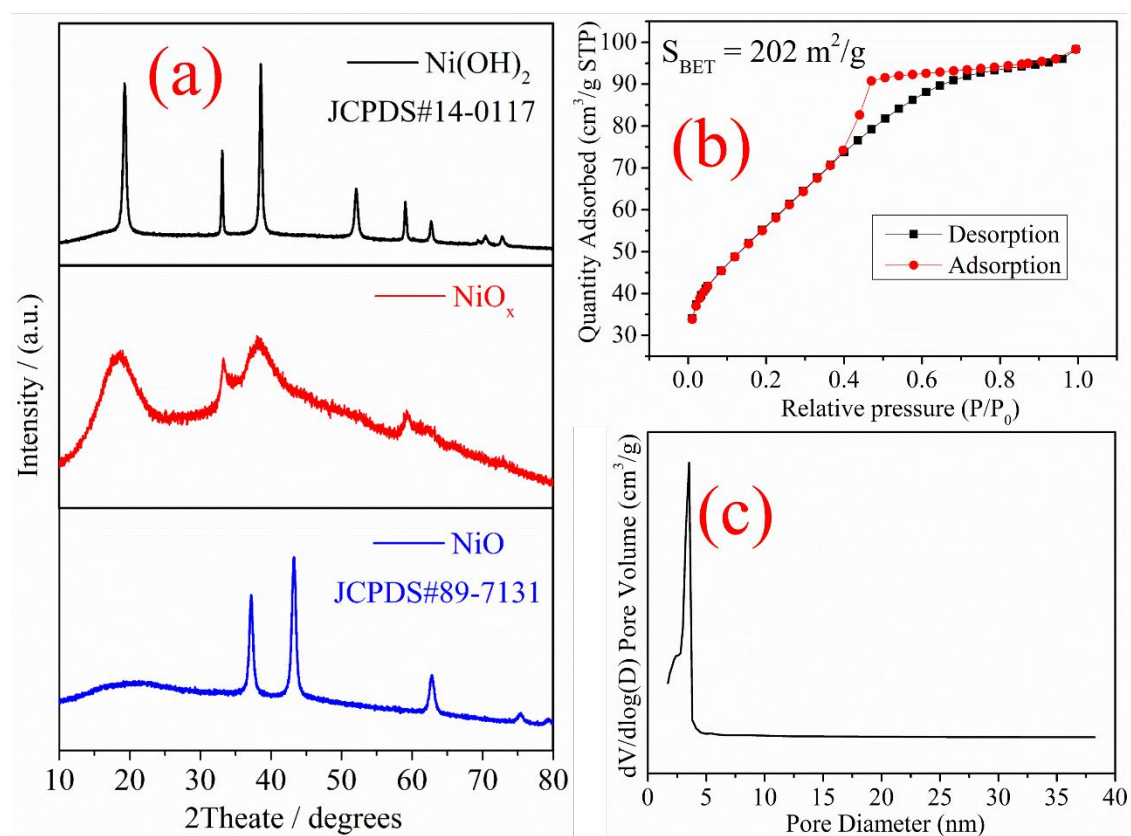

**Figure S1.** The XRD patterns of the synthesized catalysts (a),  $\text{N}_2$  adsorption/desorption isotherm of  $\text{NiO}_x$  (b), pore size distribution curves of  $\text{NiO}_x$  (c).

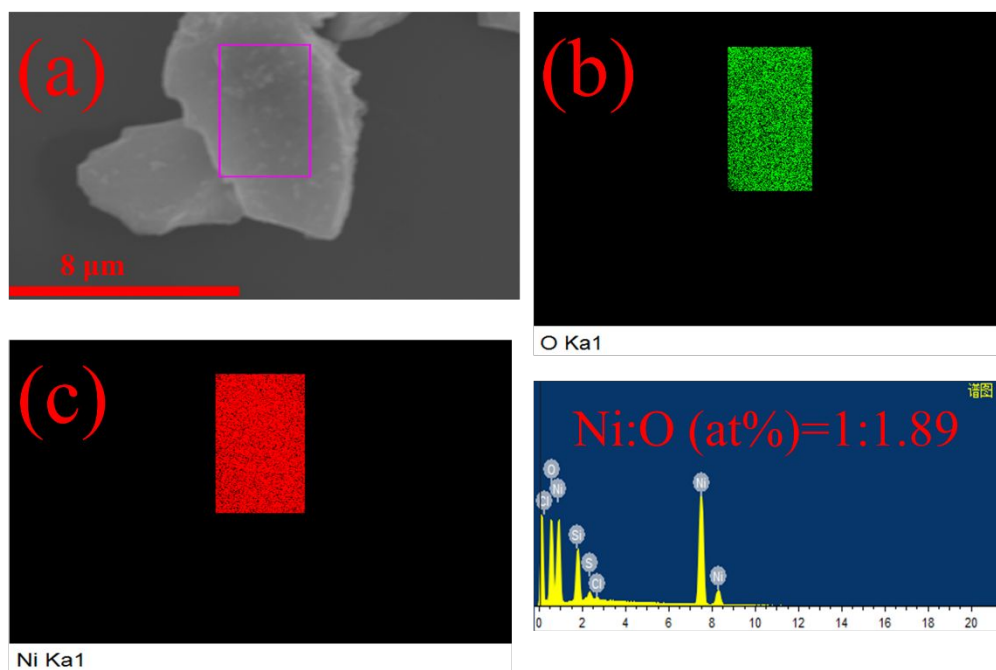

**Figure S2.** SEM image (a) and EDX elemental maps of the prepared  $\text{NiO}_x$  (b) O, (c) Ni.

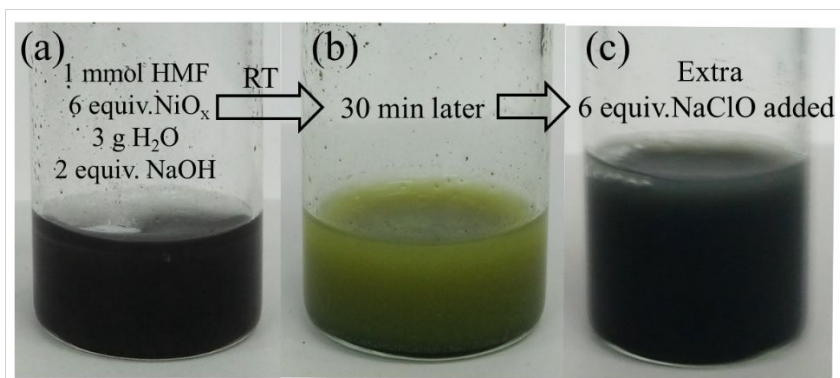

**Figure S3.** The photos of the sample in Table 1, entry 2 before (a) and after (b) reaction. The photo (c) was taken after 6 equivalents of NaClO were added into (b) mixtures. An FDCA yield of 85% and full HMF conversion were detected after 10 min reaction of the addition of 6 equivalents of NaClO.

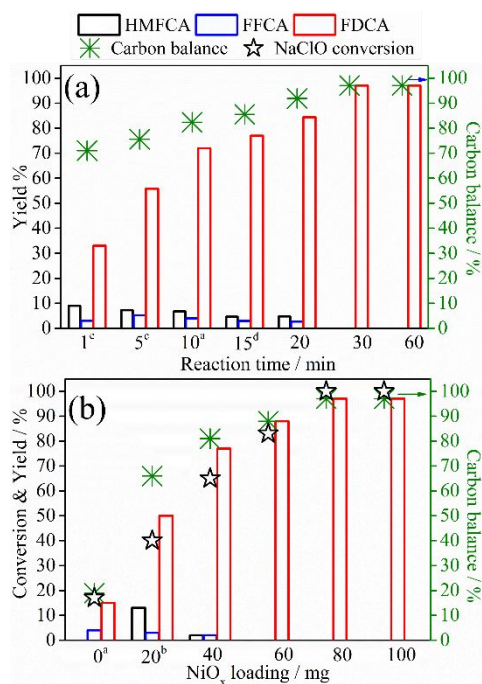

**Figure S4.** Effect of NiO<sub>x</sub> loading (a) and reaction time (b). If not specified, the default reaction conditions are as follows: HMF (1 mmol), NiO<sub>x</sub> (80 mg), 7.5wt% NaClO aqueous solution (6 mmol NaClO), 25 °C, 30 min. The HMF conversion was 100% except in the marked samples. (<sup>a</sup> 96%, <sup>b</sup> 98%, <sup>c</sup> 90%, <sup>d</sup> 99%, <sup>e</sup> 63%).

**Table S1.** The effect of the type of the oxidant.

| Entry          | Oxidant                              | HMF<br>conversion<br>(%) | FFCA yield<br>(%) | FDCA yield<br>(%) |
|----------------|--------------------------------------|--------------------------|-------------------|-------------------|
| 1 <sup>a</sup> | 1 MPa O <sub>2</sub>                 | 65                       | 2                 | 3                 |
| 2 <sup>b</sup> | 6 mmol H <sub>2</sub> O <sub>2</sub> | 26                       | 4                 | 2                 |
| 3 <sup>b</sup> | 6 mmol TBHP                          | 15                       | 3                 | 0                 |
| 4              | 6 mmol NaClO                         | 100                      | 0                 | 97                |
| 5 <sup>b</sup> | 3 mmol NaClO <sub>2</sub>            | 13                       | 2                 | 0                 |
| 6 <sup>b</sup> | 1.5 mmol NaClO <sub>4</sub>          | 23                       | 5                 | 0                 |

Reaction condition: HMF (1 mmol), oxidant, NiO<sub>2</sub> (80 mg), 25 °C, 30 min. <sup>a</sup> NaHCO<sub>3</sub> (2 mmol), H<sub>2</sub>O (3 g), 100 °C, 2 h. <sup>b</sup> NaHCO<sub>3</sub> (2 mmol), H<sub>2</sub>O (3 g).

**Table S2.** The effect of the amount of NaClO.

| Entry | NaClO<br>(mmol) | NaClO<br>Conversion<br>(%) | HMF<br>conversion<br>(%) | HMFCa<br>yield<br>(%) | FFCA<br>yield<br>(%) | FDCA<br>yield<br>(%) | Carbon<br>balance<br>(%) |
|-------|-----------------|----------------------------|--------------------------|-----------------------|----------------------|----------------------|--------------------------|
| 1     | 3               | 99                         | 84                       | 20                    | 6                    | 43                   | 82                       |
| 2     | 4               | 99                         | 94                       | 15                    | 6                    | 65                   | 92                       |
| 3     | 6               | 98                         | 100                      | 0                     | 0                    | 97                   | 97                       |

Reaction condition: HMF (1 mmol), NiO<sub>x</sub> (80 mg), 7.5 wt% NaClO aqueous solution, 25 °C, 30 min.

**Table S3.** Comparison of NiO<sub>x</sub> catalytic system with the recently published works for the production of FDCA.

| Entry    | Reaction Temperature (°C) | Reaction Time | Substrate Concentration (wt%) | FDCA yield | E factor <sup>a</sup> | Ref.                                               |
|----------|---------------------------|---------------|-------------------------------|------------|-----------------------|----------------------------------------------------|
| 1        | 120                       | 16 h          | 0.6                           | 97         | 132                   | <i>ChemSusChem</i> 11.13 (2018): 2083-2090.        |
| 2        | 130                       | 4 h           | 0.19                          | 99         | 432                   | <i>Green chem.</i> 20.17 (2018): 3921-3926.        |
| 3        | 85                        | 10 h          | 0.6                           | 93         | 138                   | <i>Appl. Catal., B</i> , 244 (2019): 965-973.      |
| 4        | 90                        | 6 h           | 0.25                          | 70         | 458                   | <i>Green Chem.</i> (2019). DOI: 10.1039/c9gc01283d |
| <b>5</b> | <b>25</b>                 | <b>30 min</b> | <b>4.2</b>                    | <b>97</b>  | <b>20</b>             | <b><i>This work</i></b>                            |

$$^a \text{ E factor} = \frac{\text{Total waste (Kg)}}{\text{Product (Kg)}}$$



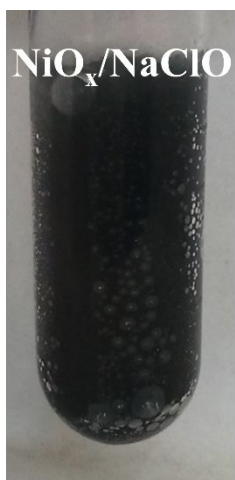

**Figure S5.** The photo of NiO<sub>x</sub> and NaClO mixtures. The photo was taken when adding NiO<sub>x</sub> (80 mg) to 7.5 wt% NaClO aqueous solution (3 g) 1 minute later. The conversion of NaClO was 58% after 30 minutes agitation.

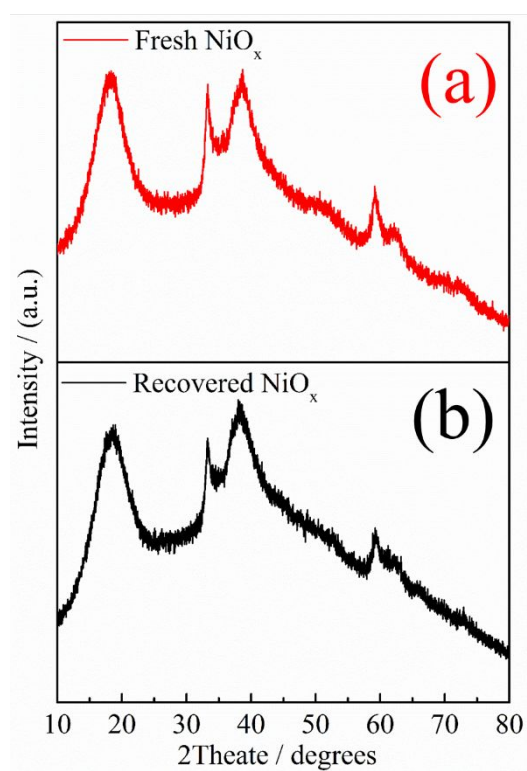

**Figure S6.** XRD patterns of (a) fresh NiO<sub>x</sub> and (b) NiO<sub>x</sub> reused after eleven runs for the oxidation of pure HMF.

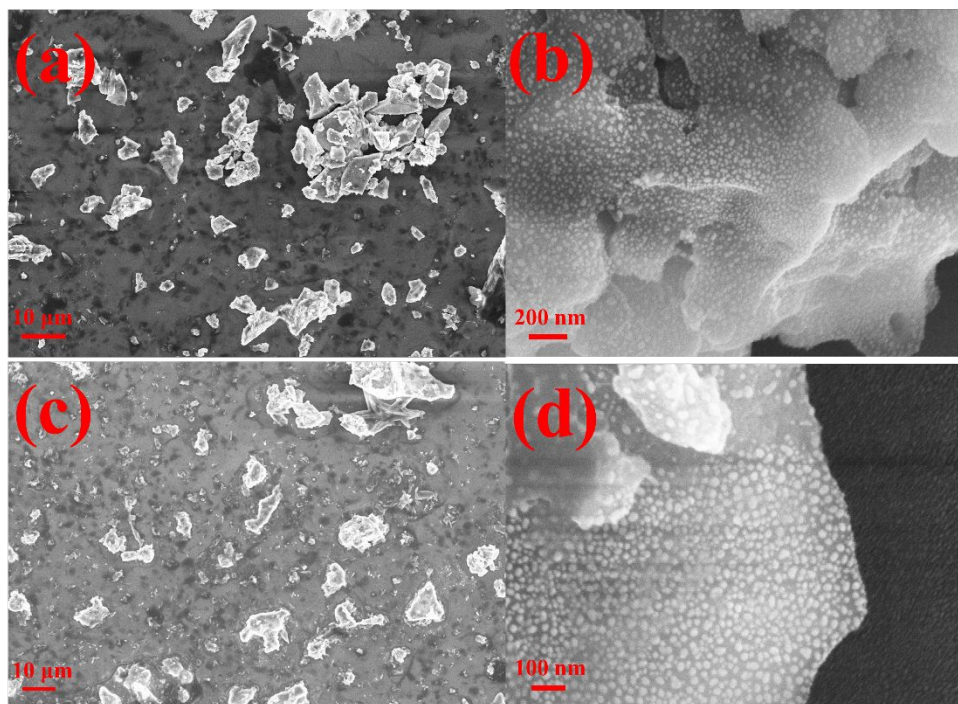

**Figure S7.** SEM images of (a), (b) fresh  $\text{NiO}_x$  and (c), (d)  $\text{NiO}_x$  reused after eleven runs for the oxidation of pure HMF.

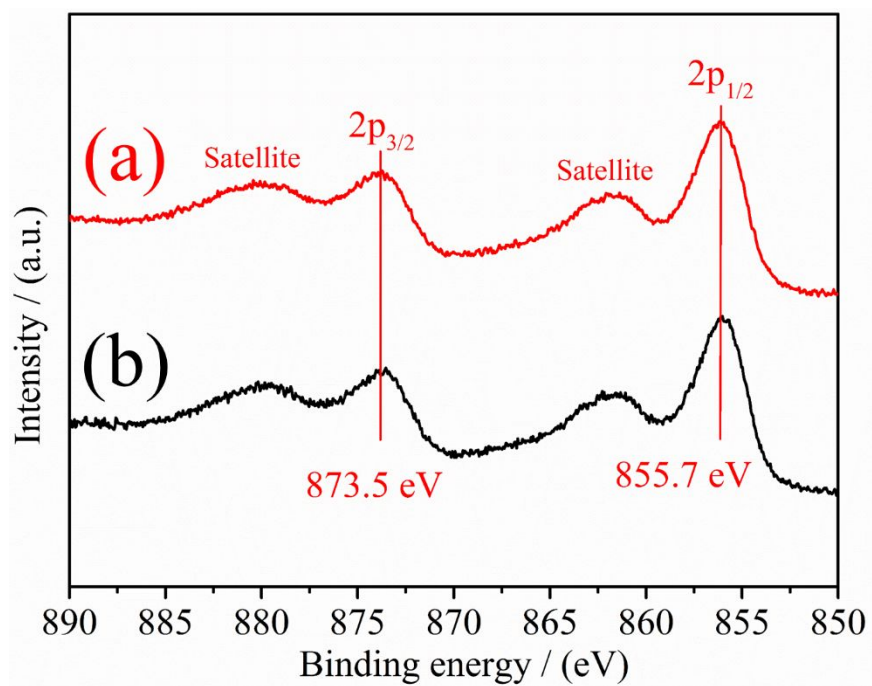

**Figure S8.** High-resolution XPS spectra Ni 2p of fresh NiO<sub>x</sub> (a) and NiO<sub>x</sub> reused after eleven runs (b) for the oxidation of pure HMF.

**Table S4.** Surface area and carbon deposit of fresh NiO<sub>x</sub> and reused NiO<sub>x</sub>.

| Entry | Material                                                    | Surface area<br>(m <sup>2</sup> /g) | Carbon deposit<br>(wt%) <sup>c</sup> |
|-------|-------------------------------------------------------------|-------------------------------------|--------------------------------------|
| 1     | NiO <sub>x</sub> -fresh                                     | 202                                 | 0.00                                 |
| 2     | NiO <sub>x</sub> - reused after<br>eleven runs <sup>a</sup> | 198                                 | 0.34                                 |
| 3     | NiO <sub>x</sub> - reused after<br>three runs <sup>b</sup>  | 168                                 | 3.30                                 |
| 4     | Refreshed NiO <sub>x</sub> by<br>NaClO                      | 197                                 | 0.68                                 |

<sup>a</sup> The substrate is pure HMF. <sup>b</sup> The substrate is glucose derived crude HMF. <sup>c</sup> Determined by an Elementar Vario EL III (Germany).

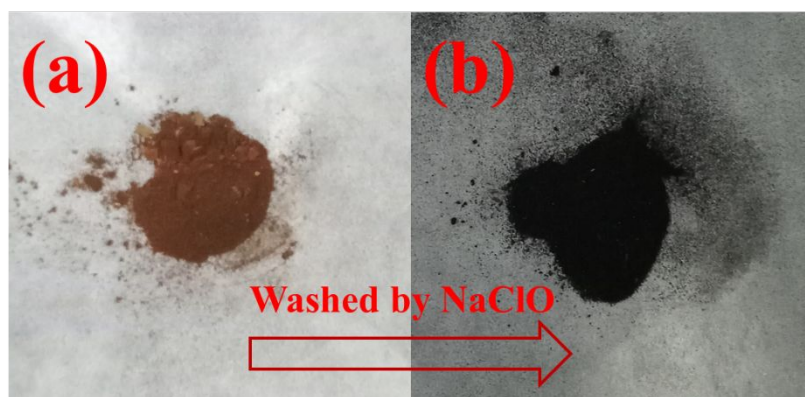

**Figure S9.** The  $\text{NiO}_x$  recovered from the reusability test of the oxidation of glucose-derived crude HMF in third runs (a), the regenerated  $\text{NiO}_x$  by washing with 10 mL 7.5 wt%  $\text{NaClO}$  aqueous solution for 30 minutes (b).

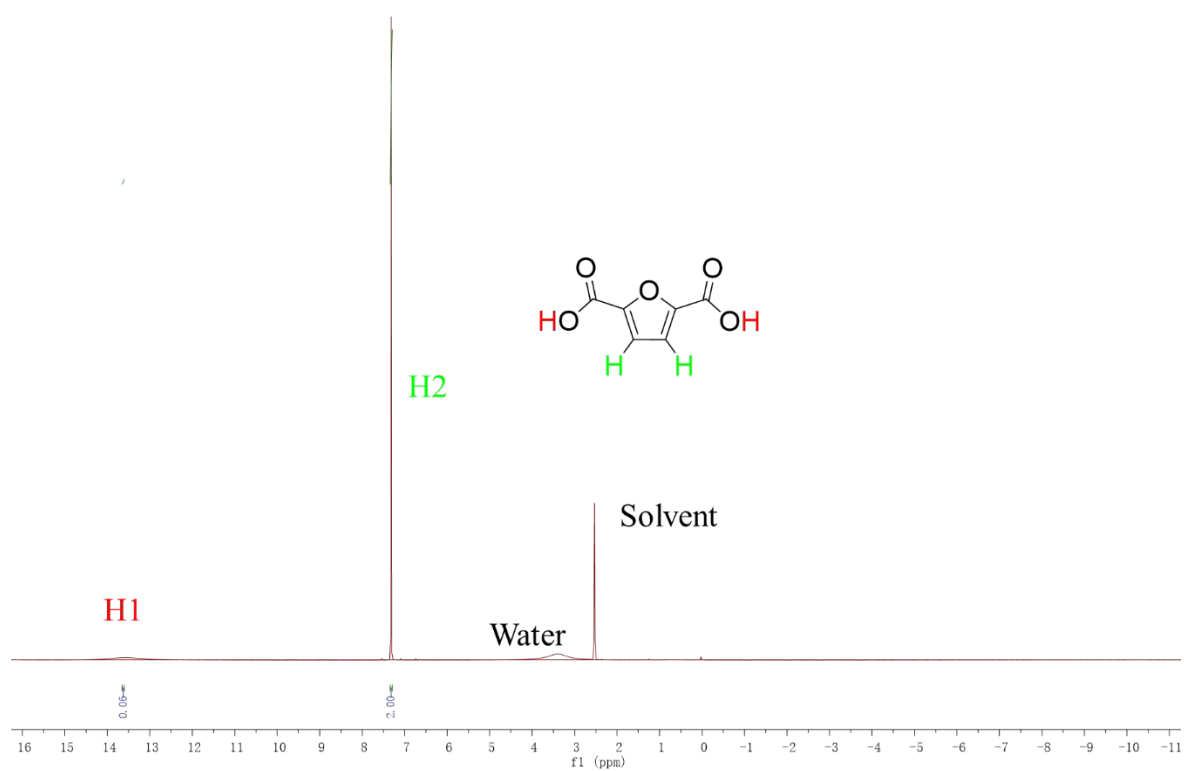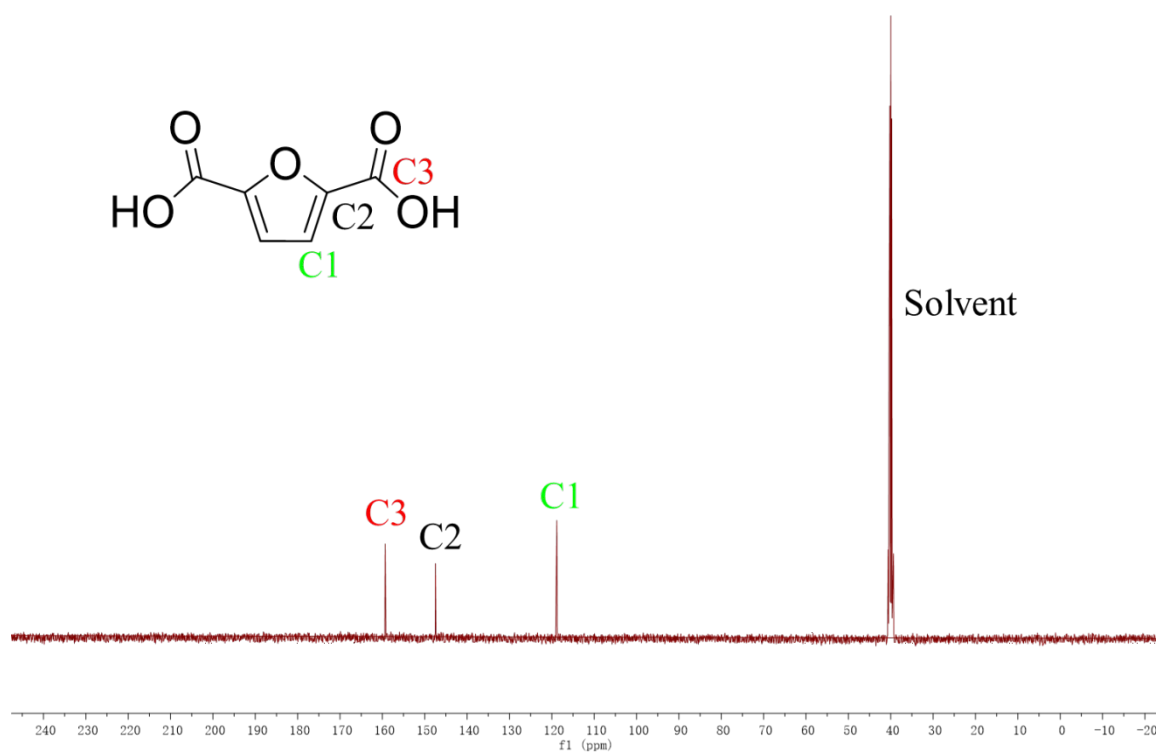

**Figure S10.** The <sup>1</sup>H NMR and <sup>13</sup>C NMR spectrum of the obtained FDCA.
